# Supplementary material for: The RASopathies: from pathogenetics to therapeutics
Source: PubMed Central journal article supplement (PMC8862741; doi:10.1242/dmm.049107), 2022-02-18
Supplement: dmm-15-049107-s1.pdf [file dmm-15-049107-s1.pdf]

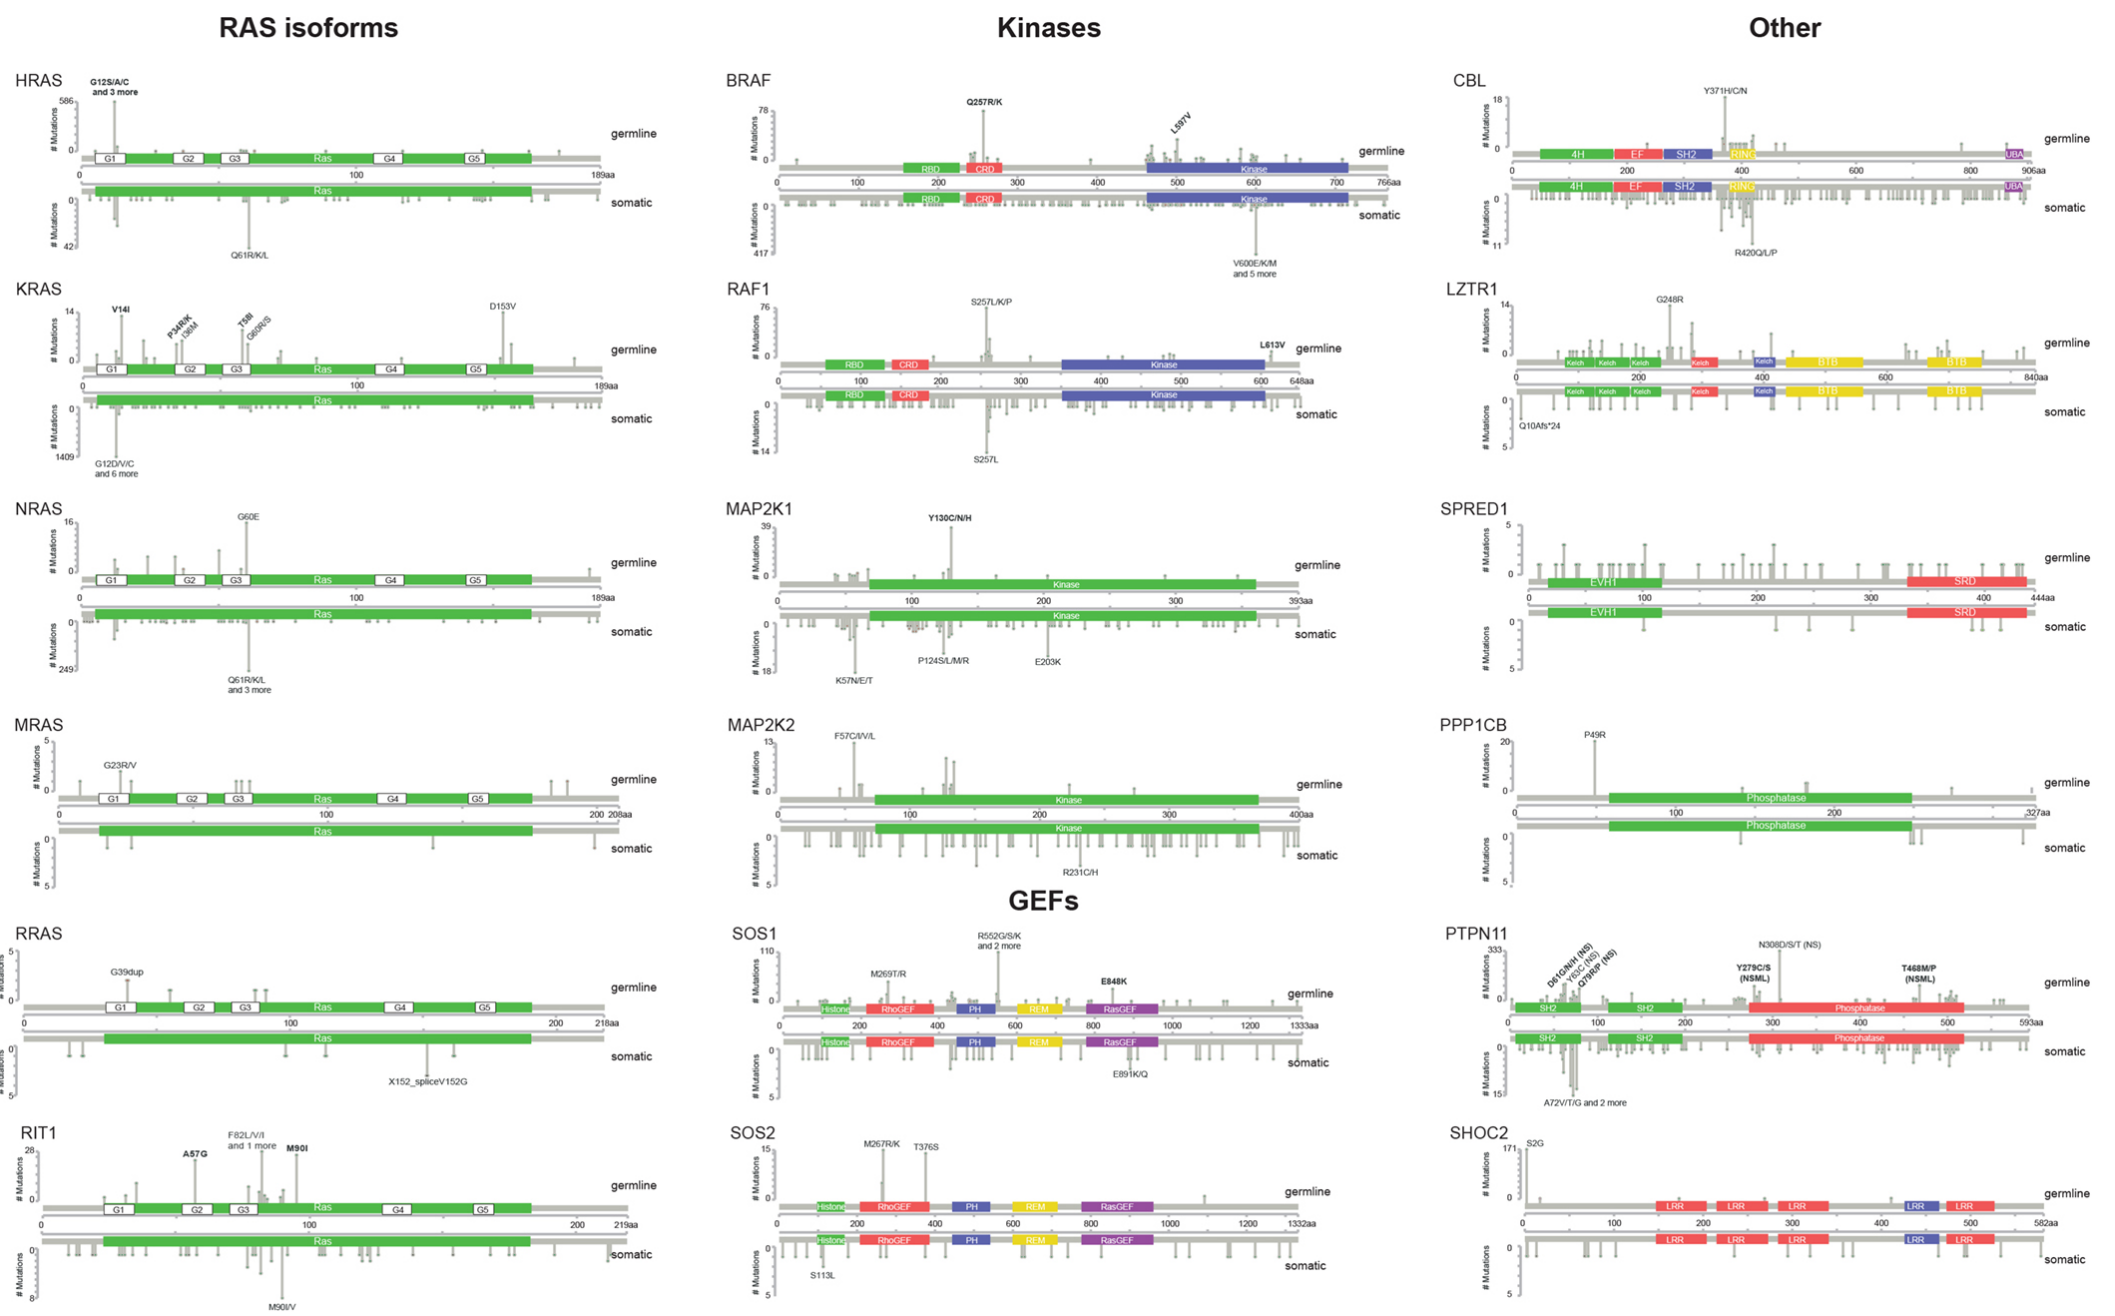

**Table S1. Homozygous knockout mouse models of RAS/MAPK genes**

| <b>Gene</b>          | <b>Viability</b>               | <b>Phenotype</b>                                                                   | <b>Reference</b>               |
|----------------------|--------------------------------|------------------------------------------------------------------------------------|--------------------------------|
| <i>Hras</i>          | Viable                         | None detected                                                                      | (Esteban et al., 2001)         |
| <i>Kras</i>          | Embryonic lethal (E12-14)      | Hematopoietic defect                                                               | (Johnson et al., 1997)         |
| <i>Nras</i>          | Viable                         | None detected                                                                      | (Umanoff et al., 1995)         |
| <i>Hras/Nras</i>     | Viable                         | None detected                                                                      | (Esteban et al., 2001)         |
| <i>Rit1</i>          | Viable                         | None detected                                                                      | (Cai et al., 2011)             |
| <i>Rras</i>          | Viable                         | None detected                                                                      | (Komatsu and Ruoslahti, 2005)  |
| <i>Rras2</i>         | Viable                         | Abnormal B and T cell survival                                                     | (Delgado et al., 2009)         |
| <i>Mras</i>          | Viable                         | None detected                                                                      | (Nunez Rodriguez et al., 2006) |
| <i>Araf</i>          | Perinatal lethal               | Abnormal proprioception and aganglionic megacolon                                  | (Pritchard et al., 1996)       |
| <i>Braf</i>          | Embryonic lethal (E10.5-E12.5) | Vascular defects                                                                   | (Wojnowski et al., 1997)       |
| <i>Raf1</i> (Craf)   | Embryonic lethal (E13.5)       | Vascular defects                                                                   | (Huser et al., 2001)           |
| <i>Araf/Raf1</i>     | Embryonic lethal (E10.5)       | Vascular defects                                                                   | (Mercer et al., 2005b)         |
| <i>Map2k1</i> (Mek1) | Embryonic lethal (E10.5)       | Vascular defects                                                                   | (Giroux et al., 1999)          |
| <i>Map2k2</i> (Mek2) | Viable                         | None detected                                                                      | (Belanger et al., 2003)        |
| <i>Mapk3</i> (Erk1)  | Viable                         | Abnormal T cell maturation                                                         | (Pages et al., 1999)           |
| <i>Mapk1</i> (Erk2)  | Embryonic lethal (E11.5)       | Placental defects                                                                  | (Hatano et al., 2003)          |
| <i>Sos1</i>          | Embryonic lethal (E9 – E11)    | Placental defects                                                                  | (Qian et al., 2000)            |
| <i>Sos2</i>          | Viable                         | None detected                                                                      | (Esteban et al., 2000)         |
| <i>Rasa1</i>         | Embryonic lethal (E9.25-E10.5) | Abnormal yolk sac vascularization                                                  | (Henkemeyer et al., 1995)      |
| <i>Syngap1</i>       | Perinatal lethal               | Decreased synaptogenesis                                                           | (Kim et al., 2003)             |
| <i>Lztr1</i>         | Perinatal lethal               | Decreased weight, facial dysmorphism, congenital heart disease                     | (Steklov et al., 2018)         |
| <i>Shoc2</i>         | Embryonic lethal               | Hypoplastic endocardial cushions                                                   | (Yi et al., 2010)              |
| <i>Spred1</i>        | Viable                         | Facial dysmorphism, impaired spatial learning and memory, abnormal social behavior | (Inoue et al., 2005)           |
| <i>Spred2</i>        | Viable                         | Facial dysmorphism, splenomegaly, cardiac hypertrophy, small size                  | (Ullrich et al., 2019)         |
| <i>Spred1/Spred2</i> | Embryonic lethal (E12.5-15.5)  | Impaired lymphatic vessel development                                              | (Taniguchi et al., 2007)       |
| <i>Ppp1cb</i>        | Perinatal lethal               | Decreased body weight                                                              | (Meehan et al., 2017)          |
| <i>Ptpn11</i>        | Embryonic lethal (E3.5-E6.5)   | Abnormal trophoblast proliferation                                                 | (Yang et al., 2006)            |

**Table S2. Orthologs of RAS/MAPK genes.** Orthologs obtained from [https://www.flyrnai.org/cgi-bin/DRSC\\_orthologs.pl](https://www.flyrnai.org/cgi-bin/DRSC_orthologs.pl).

| <i>H. sapiens</i> | <i>M. musculus</i> | <i>C. elegans</i> | <i>D. melanogaster</i> | <i>D. rerio</i> |
|-------------------|--------------------|-------------------|------------------------|-----------------|
| HRAS              | <i>Hras</i>        | <i>let-60</i>     | <i>Ras85D</i>          | <i>hrasb</i>    |
| KRAS              | <i>Kras</i>        | <i>let-60</i>     | <i>Ras85D</i>          | <i>kras</i>     |
| NRAS              | <i>Nras</i>        | <i>let-60</i>     | <i>Ras85D</i>          | <i>nras</i>     |
| RIT1              | <i>Rit1</i>        | NA                | <i>Ric</i>             | <i>rit1</i>     |
| RRAS              | <i>Rras</i>        | <i>ras-1</i>      | <i>Ras64B</i>          | <i>rres</i>     |
| MRAS              | <i>Mras</i>        | <i>ras-2</i>      | <i>Ras64B/Ras85D</i>   | <i>mras</i>     |
| ARAF              | <i>Araf</i>        | <i>lin-45</i>     | <i>Raf</i>             | <i>araf</i>     |
| BRAF              | <i>Braf</i>        | <i>lin-45</i>     | <i>Raf</i>             | <i>braf</i>     |
| RAF1              | <i>Raf1</i>        | <i>lin-45</i>     | <i>Raf</i>             | <i>raf1b</i>    |
| MAP2K1            | <i>Map2k1</i>      | <i>mek-2</i>      | <i>Dsor1</i>           | <i>map2k1</i>   |
| MAP2K2            | <i>Map2k2</i>      | <i>mek-2</i>      | <i>Dsor1</i>           | <i>map2k2a</i>  |
| SOS1              | <i>Sos1</i>        | <i>sos-1</i>      | <i>Sos</i>             | <i>sos1</i>     |
| SOS2              | <i>Sos2</i>        | <i>sos-1</i>      | <i>Sos</i>             | <i>sos2</i>     |
| RASA1             | <i>Rasa1</i>       | <i>gap-3</i>      | <i>vap</i>             | <i>rasa1a</i>   |
| SYNGAP1           | <i>Syngap1</i>     | <i>gap-2</i>      | <i>CG42684</i>         | <i>syngap1b</i> |
| CBL               | <i>Cbl</i>         | <i>sli-1</i>      | <i>Cbl</i>             | <i>cbl</i>      |
| LZTR1             | <i>Lztr1</i>       | <i>F53E4.1</i>    | <i>Lztr1 (CG3711)</i>  | <i>lztr1</i>    |
| SHOC2             | <i>Shoc2</i>       | <i>soc-2</i>      | <i>Sur-8</i>           | <i>shoc2</i>    |
| SPRED1            | <i>Spred1</i>      | <i>unc-34</i>     | <i>Spred</i>           | <i>spred1</i>   |
| PTPN11            | <i>Ptpn11</i>      | <i>ptp-2</i>      | <i>csw</i>             | <i>ptpn11a</i>  |
| PPP1CB            | <i>Ppp1cb</i>      | <i>gsp-1</i>      | <i>flw</i>             | <i>ppp1cb</i>   |

**Table S3. Germline mouse models of NS.** In this table and those that follow, ND denotes not determined, WNL denotes within normal limits

|                 | <b>Ptpn11</b> <sup>D61G/+</sup>                            | <b>Ptpn11</b> <sup>N308D/+</sup>        | <b>Sos1</b> <sup>E846K/+</sup>    |
|-----------------|------------------------------------------------------------|-----------------------------------------|-----------------------------------|
| Strain          | B6 X 129Sv                                                 | B6                                      | B6                                |
| Viability       | Decreased viability (background specific)                  | viable                                  | Viable, decreased life expectancy |
| Cardiac         | Septal defects                                             | WNL                                     | Aortic stenosis, cardiomegaly     |
| Pulmonary       | ND                                                         | ND                                      | ND                                |
| Hematologic     | Splenomegaly, MPN                                          | Splenomegaly, MPN                       | Splenomegaly, MPN                 |
| Craniofacial    | Facial dysmorphism                                         | Facial dysmorphism                      | Facial dysmorphism                |
| Neurologic      | Deficits in spatial learning and memory                    | Deficits in spatial learning and memory | ND                                |
| Oncologic       | ND                                                         | ND                                      | ND                                |
| Dermatologic    | ND                                                         | ND                                      | ND                                |
| Musculoskeletal | ND                                                         | ND                                      | ND                                |
| Reference       | (Araki et al., 2009; Araki et al., 2004; Lee et al., 2014) | (Araki et al., 2009)                    | (Chen et al., 2010)               |

|                         | <b>Raf1</b> <sup>L613V/+</sup>                   | <b>Raf1</b> <sup>D486N/+</sup> |
|-------------------------|--------------------------------------------------|--------------------------------|
| Strain                  | B6 X 129Sv                                       | B6 X 129Sv                     |
| Embryonic-Heterozygotes | Viable, decreased survival (B6 embryonic lethal) | Viable, decreased survival     |
| Cardiac                 | Eccentric cardiac hypertrophy                    | Concentric cardiac hypertrophy |
| Pulmonary               | ND                                               | ND                             |
| Hematologic             | Splenomegaly, MPN                                | WNL                            |
| Craniofacial            | Facial dysmorphism                               | Facial dysmorphism             |
| Neurologic              | Astrogliosis                                     | ND                             |
| Oncologic               | ND                                               | ND                             |
| Dermatologic            | ND                                               | ND                             |
| Musculoskeletal         | ND                                               | ND                             |
| Reference               | (Holter et al., 2019; Wu et al., 2011)           | (Wu et al., 2012)              |

|                 | <b>Kras<sup>V14I/+</sup></b>                                                                  | <b>Kras<sup>P34R/+</sup></b>  | <b>Kras<sup>T58I/+</sup></b>  |
|-----------------|-----------------------------------------------------------------------------------------------|-------------------------------|-------------------------------|
| Strain          | B6 X 129Sv                                                                                    | B6                            | B6 X 129Sv                    |
| Viability       | Viable, fertile                                                                               | Perinatal lethality           | Viable                        |
| Cardiac         | Cardiac hyperplasia                                                                           | WNL                           | Cardiomegaly                  |
| Pulmonary       | ND                                                                                            | Sacculation defect            | WNL                           |
| Hematologic     | Splenomegaly, MPN                                                                             | ND                            | Splenomegaly, MPN             |
| Craniofacial    | Facial dysmorphia                                                                             | Facial dysmorphia             | Facial dysmorphia             |
| Neurologic      | ND                                                                                            | ND                            | ND                            |
| Oncologic       | Histiocytic sarcoma, lymphoma, adenomas                                                       | Histiocytic sarcoma, lymphoma | Histiocytic sarcoma, lymphoma |
| Dermatologic    | ND                                                                                            | ND                            | ND                            |
| Musculoskeletal | ND                                                                                            | ND                            | ND                            |
| Reference       | (Hernandez-Porras et al., 2014; Hernandez-Porras et al., 2015; Hernandez-Porras et al., 2016) | (Wong et al., 2020)           | (Wong et al., 2020)           |

|              | <b>Rit1<sup>M90I/+</sup></b> | <b>Rit1<sup>A57G/+</sup></b>                   | <b>Lztr1<sup>+/-</sup></b> |
|--------------|------------------------------|------------------------------------------------|----------------------------|
| Strain       | B6                           | B6                                             | B6                         |
| Viability    | Viable                       | Perinatal lethality (50%), decreased longevity | Decreased longevity        |
| Cardiac      | Hypertrophy                  | Hypertrophy                                    | hypertrophy                |
| Pulmonary    | ND                           | ND                                             | ND                         |
| Hematologic  | Splenomegaly                 | Splenomegaly                                   | WNL                        |
| Craniofacial | Facial dysmorphia            | Facial dysmorphia                              | Facial dysmorphia          |
| Neurologic   | ND                           | ND                                             | ND                         |
| Reference    | (Castel et al., 2019)        | (Takahara et al., 2019)                        | (Steklov et al., 2018)     |

**Table S4. Germline knock-in mouse models of NS-ML**

|                 | <b>Ptpn11<sup>Y279C/+</sup></b> | <b>Ptpn11<sup>T468M/+</sup></b>      |
|-----------------|---------------------------------|--------------------------------------|
| Strain          | B6                              | B6 X 129Sv                           |
| Viability       | Viable, decreased survival      | Viable                               |
| Cardiac         | Cardiomegaly                    | Cardiomegaly, dilated cardiomyopathy |
| Pulmonary       | ND                              | ND                                   |
| Hematologic     | WNL                             | splenomegaly                         |
| Craniofacial    | Facial dysmorphism              | Facial dysmorphism                   |
| Neurologic      | ND                              | ND                                   |
| Oncologic       | ND                              | None                                 |
| Dermatologic    | ND                              | ND                                   |
| Musculoskeletal | Pectus carinatum and excavatum  | ND                                   |
| Reference       | (Marin et al., 2011)            | (Tajan et al., 2014)                 |

**Table S5. Germline knock-in mouse models of CS**

|                 | <b>CC-FR-Hras<sup>G12V</sup></b>          | <b>Hras<sup>G12V</sup>-IRES-<math>\beta</math>-geo</b>                  | <b>Hras<sup>G12S</sup></b>              |
|-----------------|-------------------------------------------|-------------------------------------------------------------------------|-----------------------------------------|
| Strain          | B6                                        | B6                                                                      | B6                                      |
| Viability       | Perinatal lethality (80%)                 | Viable                                                                  | Viable                                  |
| Cardiac         | WNL                                       | Hypertrophy, enlarged aortic valves                                     | cardiomegaly                            |
| Pulmonary       | ND                                        | ND                                                                      | ND                                      |
| Hematologic     | ND                                        | ND                                                                      | WNL                                     |
| Craniofacial    | Facial dysmorphism, tooth enamel defect   | Facial dysmorphism                                                      | Facial dysmorphism                      |
| Neurologic      | ND                                        | Learning deficits, hypermotivity                                        | ND                                      |
| Oncologic       | Papilloma, angiosarcoma                   | None                                                                    | none                                    |
| Dermatologic    | ND                                        | ND                                                                      | Atopic dermatitis                       |
| Musculoskeletal | ND                                        | ND                                                                      | ND                                      |
| Reference       | (Chen et al., 2009; Goodwin et al., 2014) | (Schreiber et al., 2017; Schuhmacher et al., 2008; Viosca et al., 2009) | (Katata et al., 2020; Oba et al., 2018) |

**Table S6. Germline knock-in mouse models of CFC**

|                 | <b>Braf</b> <sup>+/LSLV600E</sup>             | <b>LSL-Braf</b> <sup>L597V</sup>            | <b>Mek1</b> <sup>Y130C/+</sup> |
|-----------------|-----------------------------------------------|---------------------------------------------|--------------------------------|
| Strain          | B6 X 129Sv                                    | B6                                          | 129Sv                          |
| Viability       | Decreased                                     | 70% survive to adulthood                    | Viable                         |
| Cardiac         | Cardiomegaly                                  | Cardiomegaly                                | WNL                            |
| Pulmonary       | ND                                            | WNL                                         | ND                             |
| Hematologic     | splenomegaly                                  | splenomegaly                                | WNL                            |
| Craniofacial    | Facial dysmorphism                            | Facial dysmorphism                          | Facial dysmorphism             |
| Neurologic      | Hyperactivity, seizures                       | ND                                          | astrogliosis                   |
| Oncologic       | Lung adenomas, melanomas                      | Skin papillomas, intestinal polyps          | none                           |
| Musculoskeletal | ND                                            | Skeletal myopathy                           | ND                             |
| Reference       | (Mercer et al., 2005a; Urosevic et al., 2011) | (Andreadi et al., 2012; Maeda et al., 2021) | (Aoidi et al., 2018)           |

|                 | <b>Braf</b> <sup>Q241R/+</sup> | <b>Braf</b> <sup>Q241R/+</sup>   | <b>Braf</b> <sup>Q241R/+</sup>   |
|-----------------|--------------------------------|----------------------------------|----------------------------------|
| Strain          | B6                             | BALB/c                           | ICR                              |
| Viability       | Embryonic lethal E14.5         | Perinatal lethality (90% by P28) | Perinatal lethality (50% by P28) |
| Cardiac         | Cardiomegaly                   | Cardiomegaly, ASD                | Cardiomegaly                     |
| Pulmonary       | ND                             | ND                               | ND                               |
| Hematologic     | Lymphangiectasia               | ND                               | Lymphangiectasia                 |
| Craniofacial    | ND                             | ND                               | ND                               |
| Neurologic      | ND                             | ND                               | Learning deficit                 |
| Oncologic       | ND                             | ND                               | ND                               |
| Musculoskeletal | ND                             | ND                               | polydactyly                      |
| Dermatologic    | ND                             | ND                               | Long dystrophic nails            |
| Reference       | (Inoue et al., 2014)           | (Moriya et al., 2015)            | (Moriya et al., 2015)            |

**Table S7. Germline knockout mouse model of LS**

|                 | <b>Spred1</b> <sup>-/-</sup>                                                           |
|-----------------|----------------------------------------------------------------------------------------|
| Strain          | B6                                                                                     |
| Viability       | Viable                                                                                 |
| Cardiac         | WNL                                                                                    |
| Pulmonary       | Increased airway hyperresponsiveness                                                   |
| Hematologic     | WNL                                                                                    |
| Craniofacial    | Facial dysmorphism                                                                     |
| Neurologic      | Impaired spatial learning and memory                                                   |
| Oncologic       | ND                                                                                     |
| Dermatologic    | ND                                                                                     |
| Musculoskeletal | ND                                                                                     |
| Reference       | (Borrie et al., 2021a; Borrie et al., 2021b; Denayer et al., 2008; Inoue et al., 2005) |
